# Supplementary material for: Aging human abdominal subcutaneous white adipose tissue at single cell resolution
Source: PubMed Central journal article supplement (PMC11561672; doi:10.1111/acel.14287), 2024-08-14

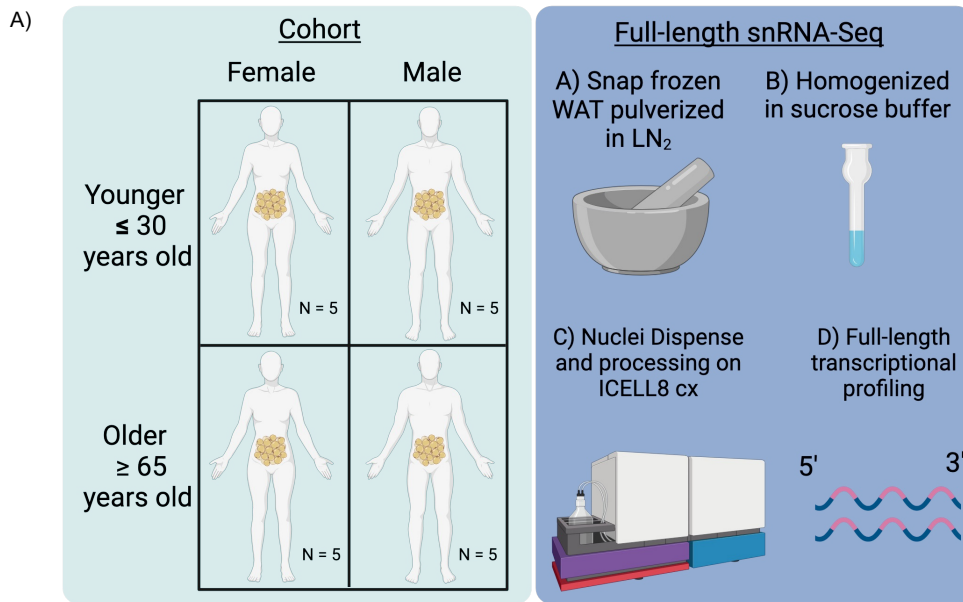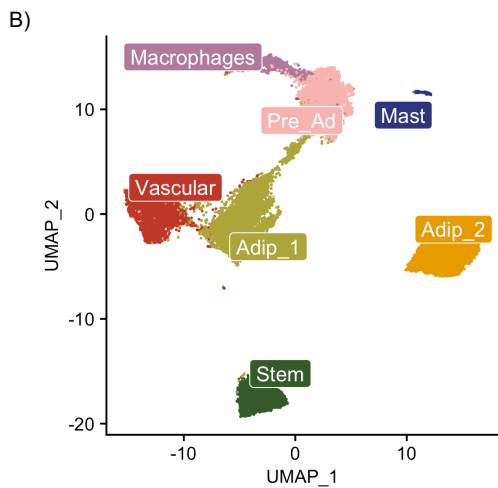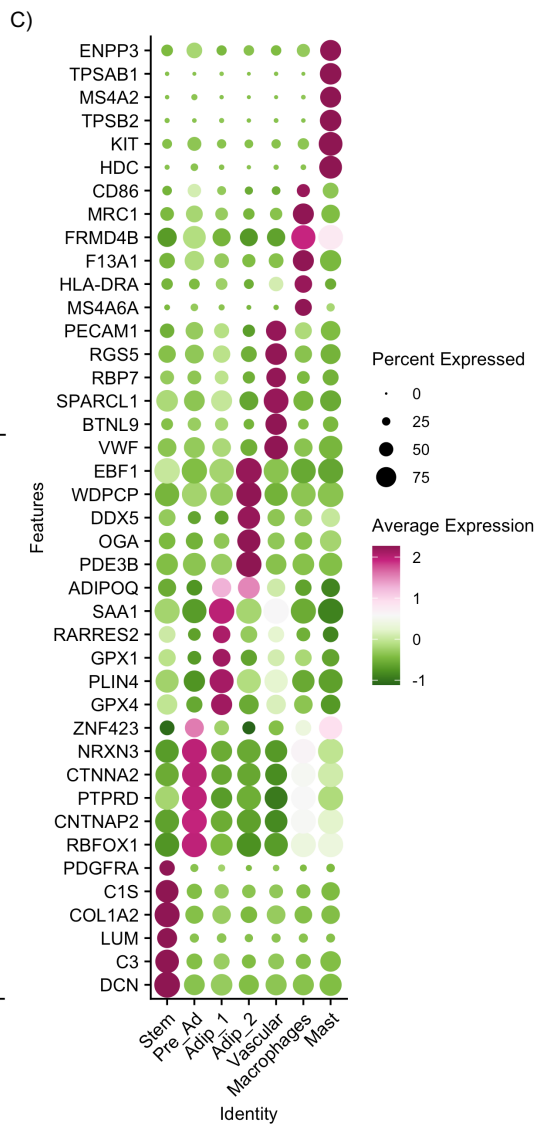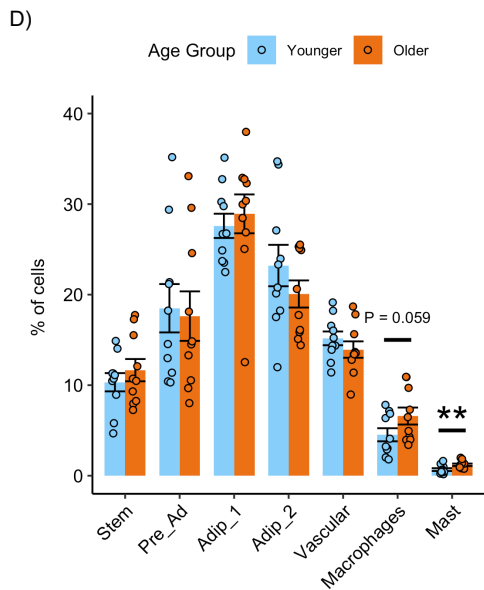

Figure 1

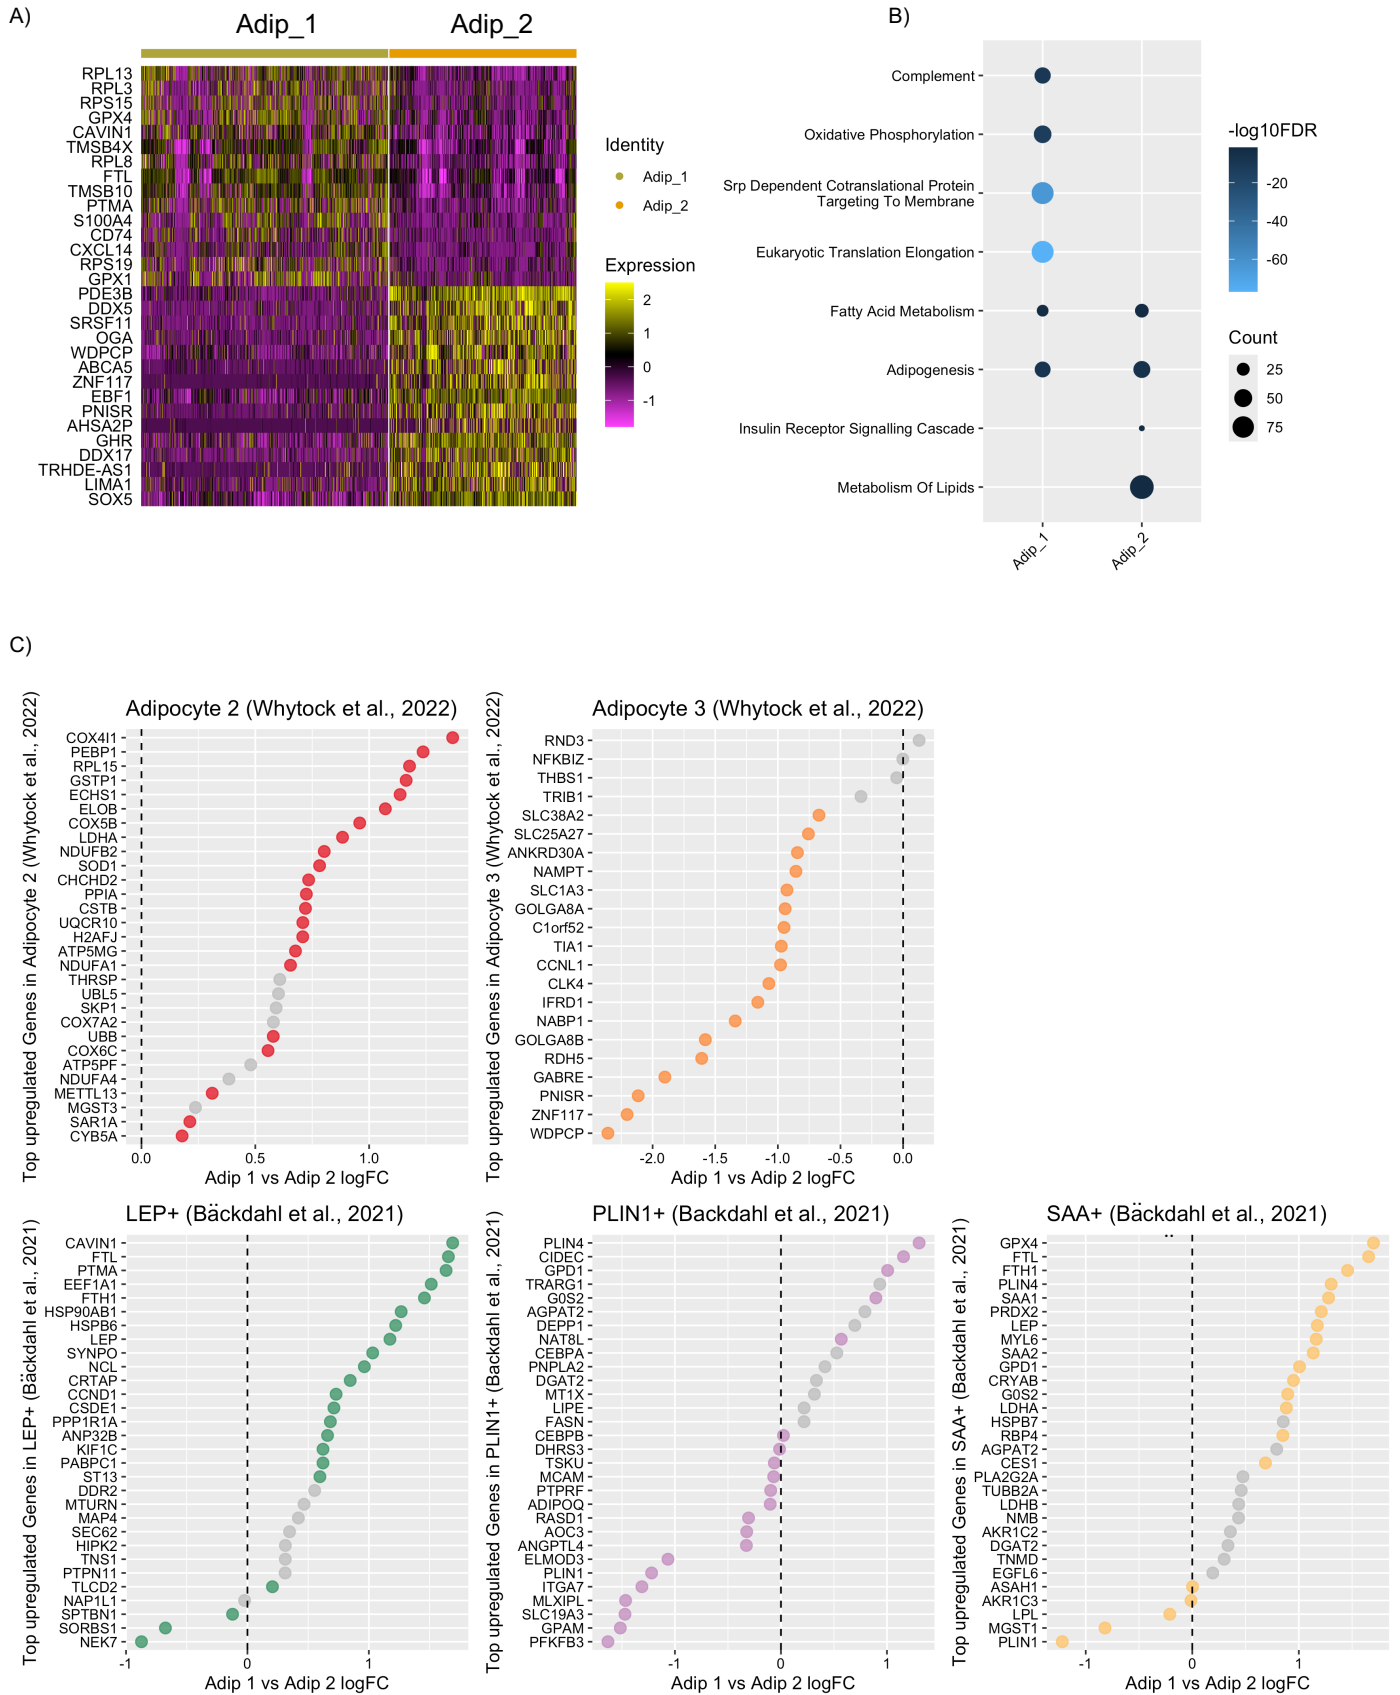

**Figure 2**

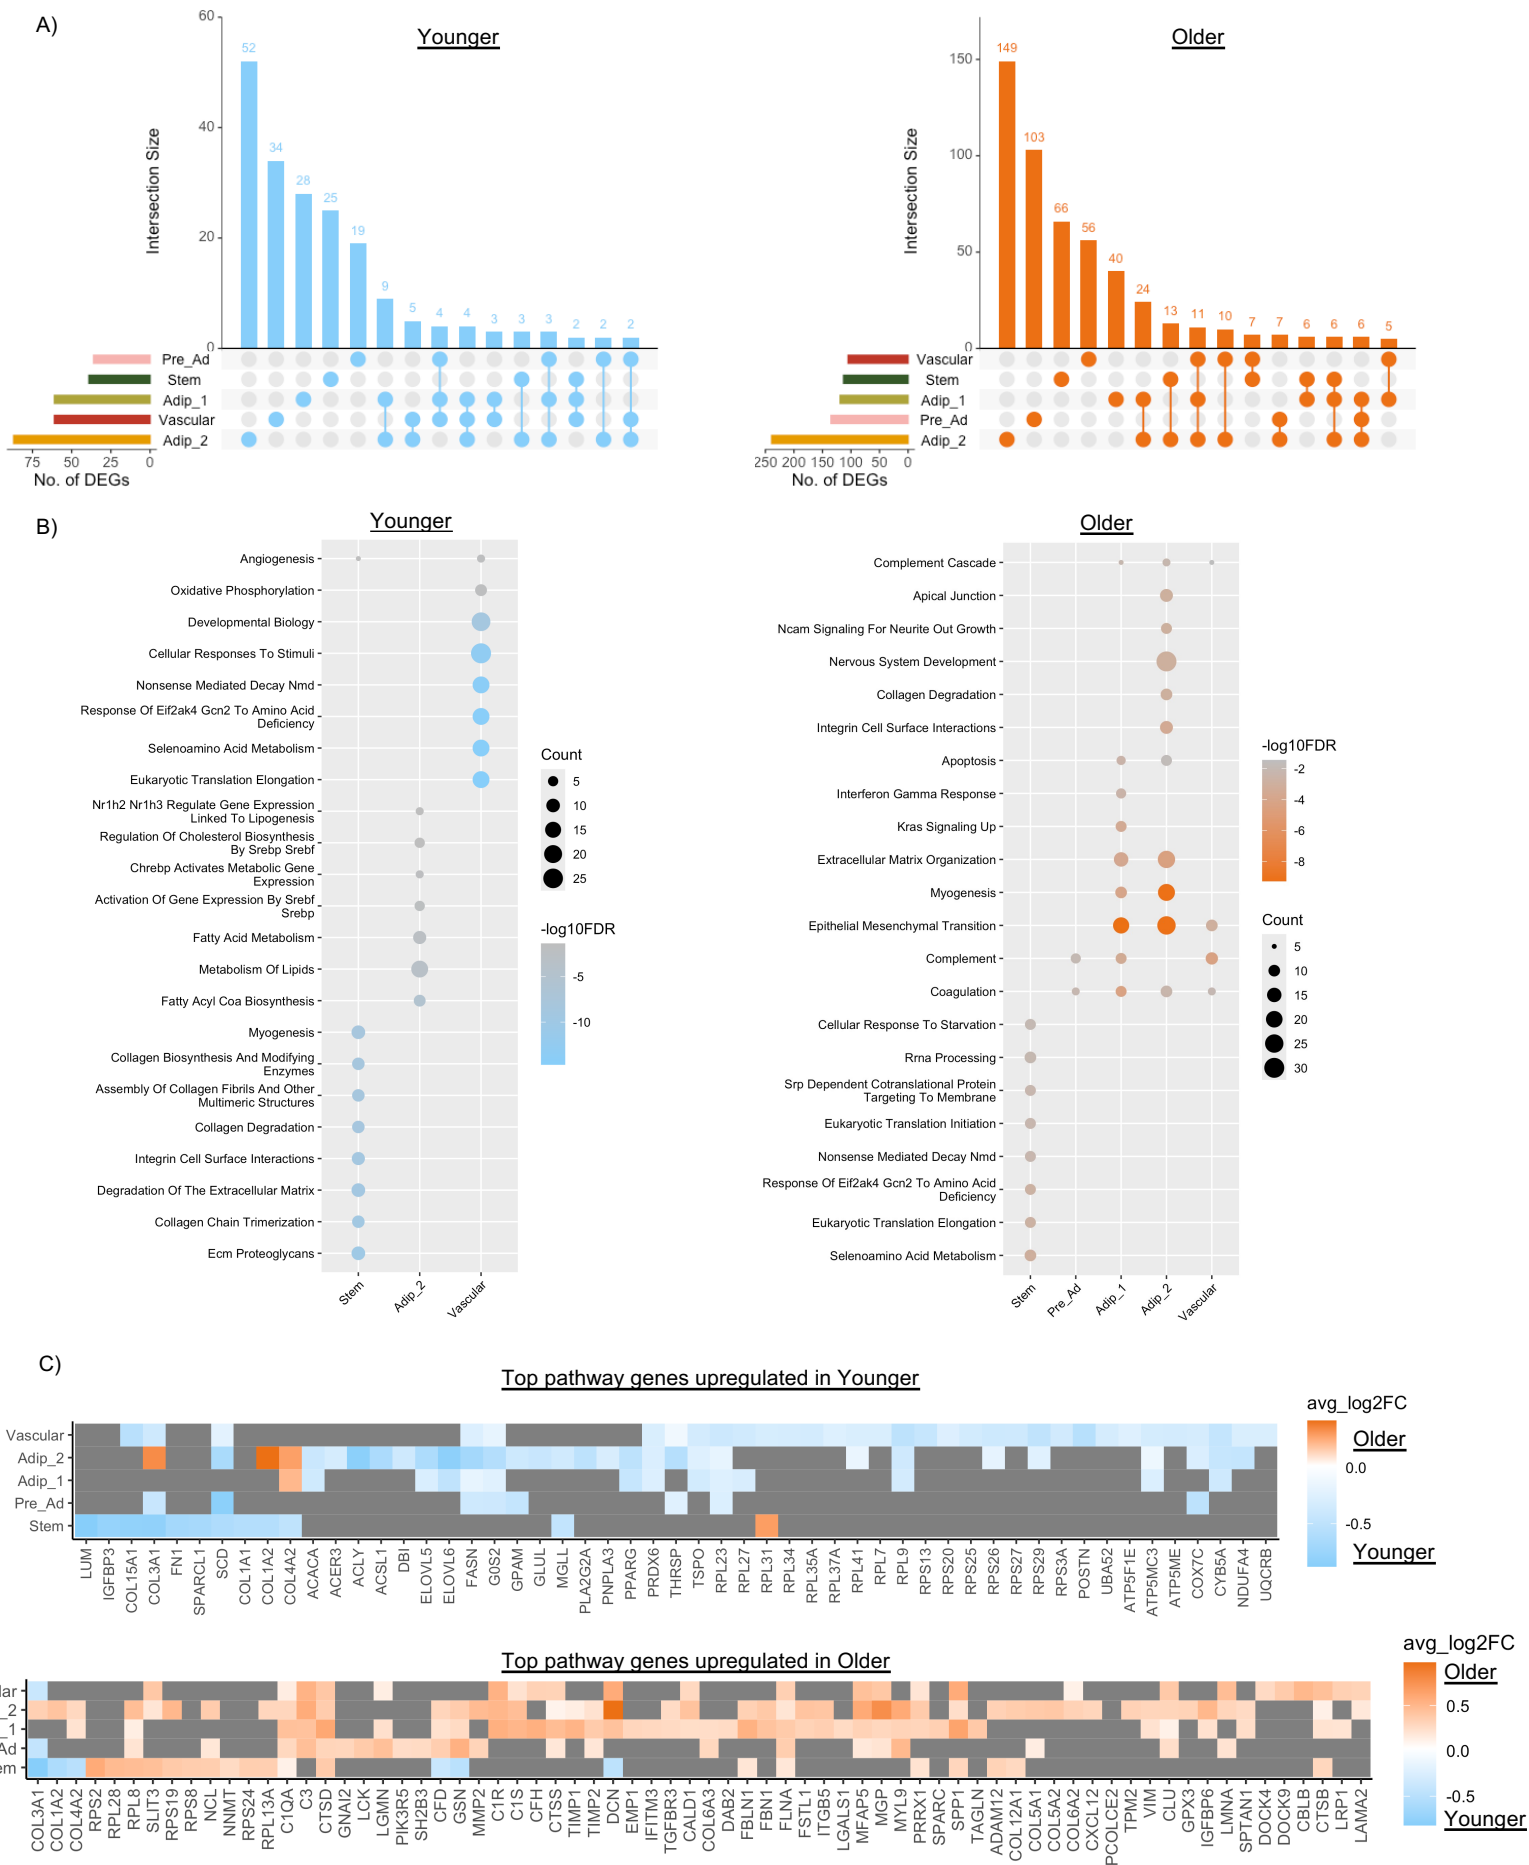

**Figure 3**

A)

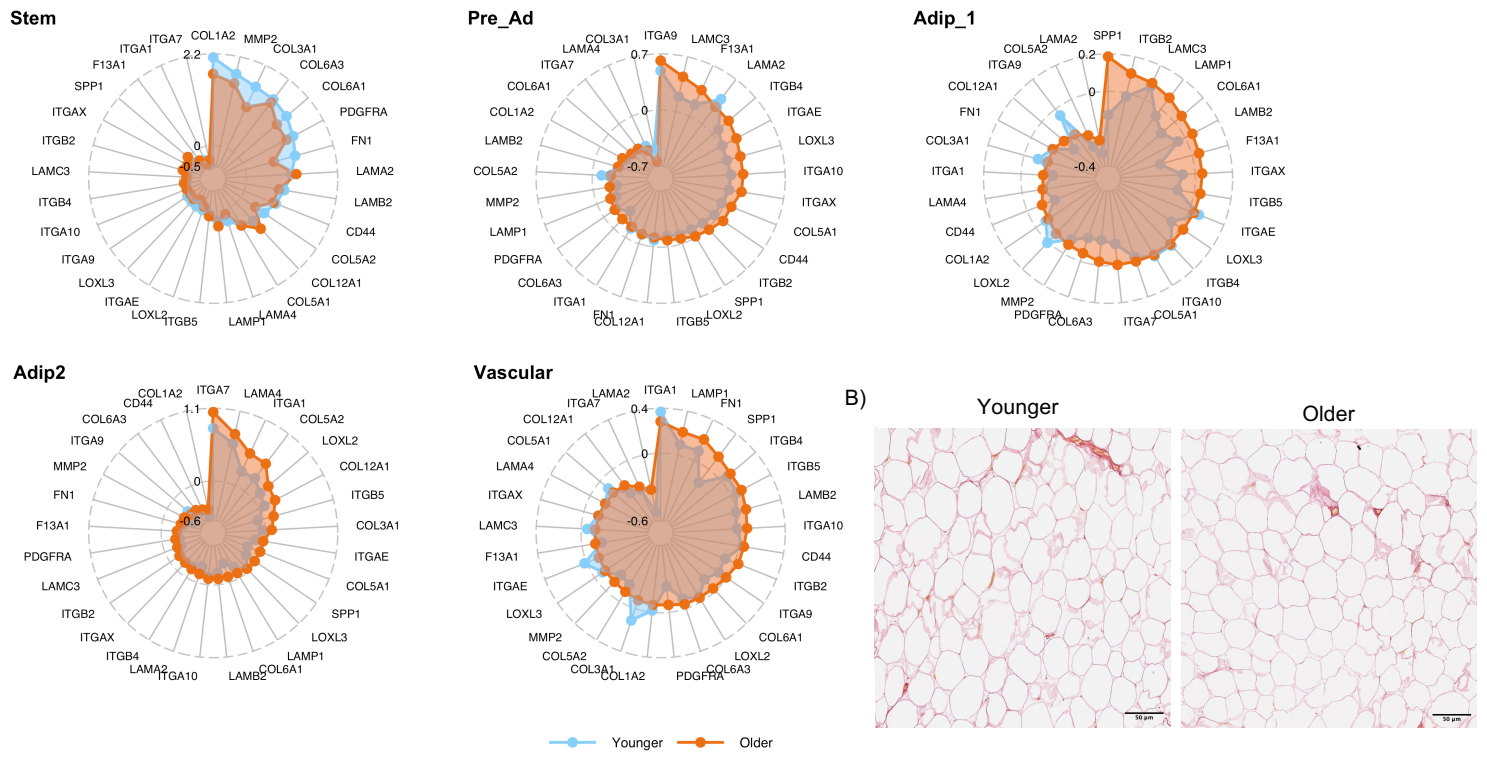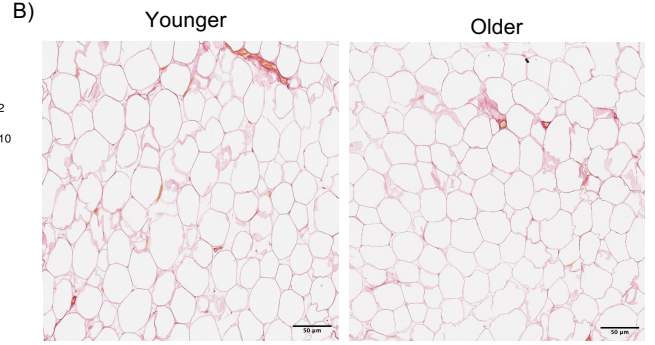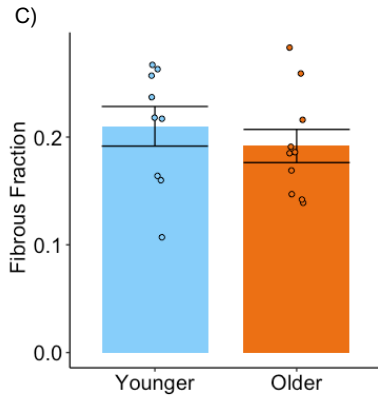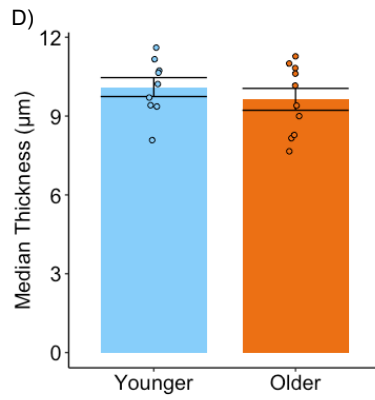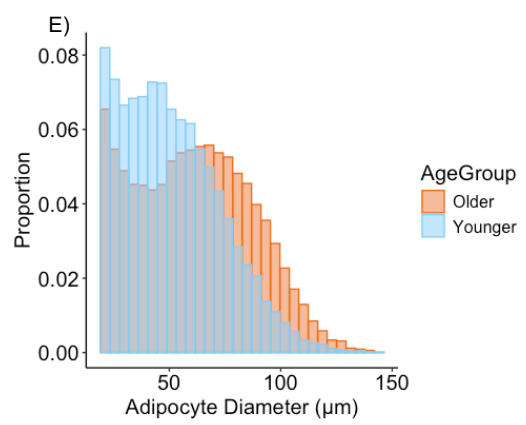

**Figure 4**

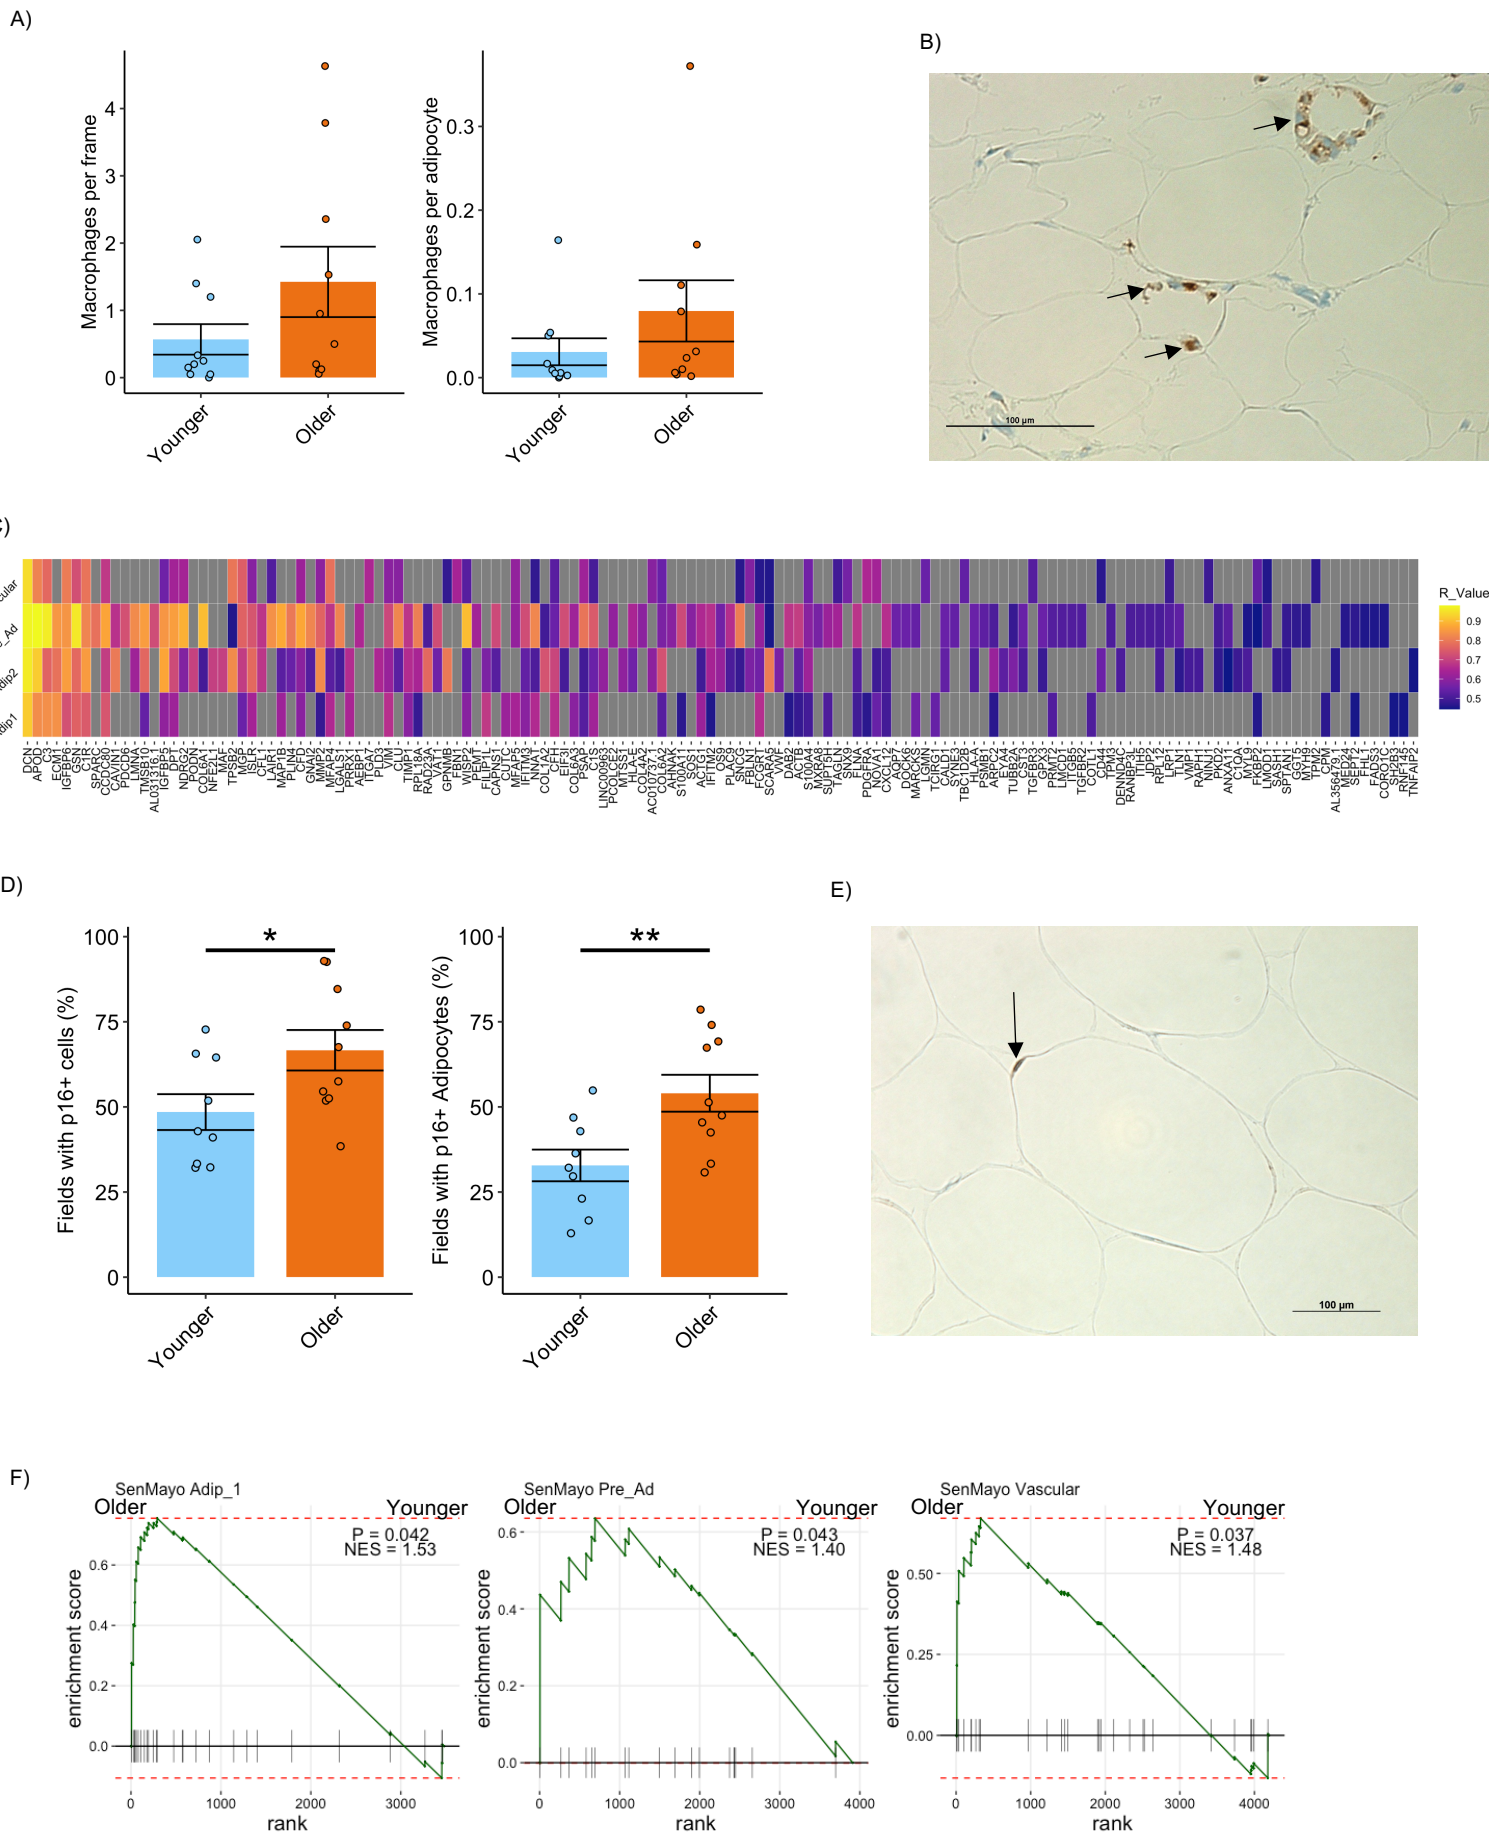

**Figure 5.**

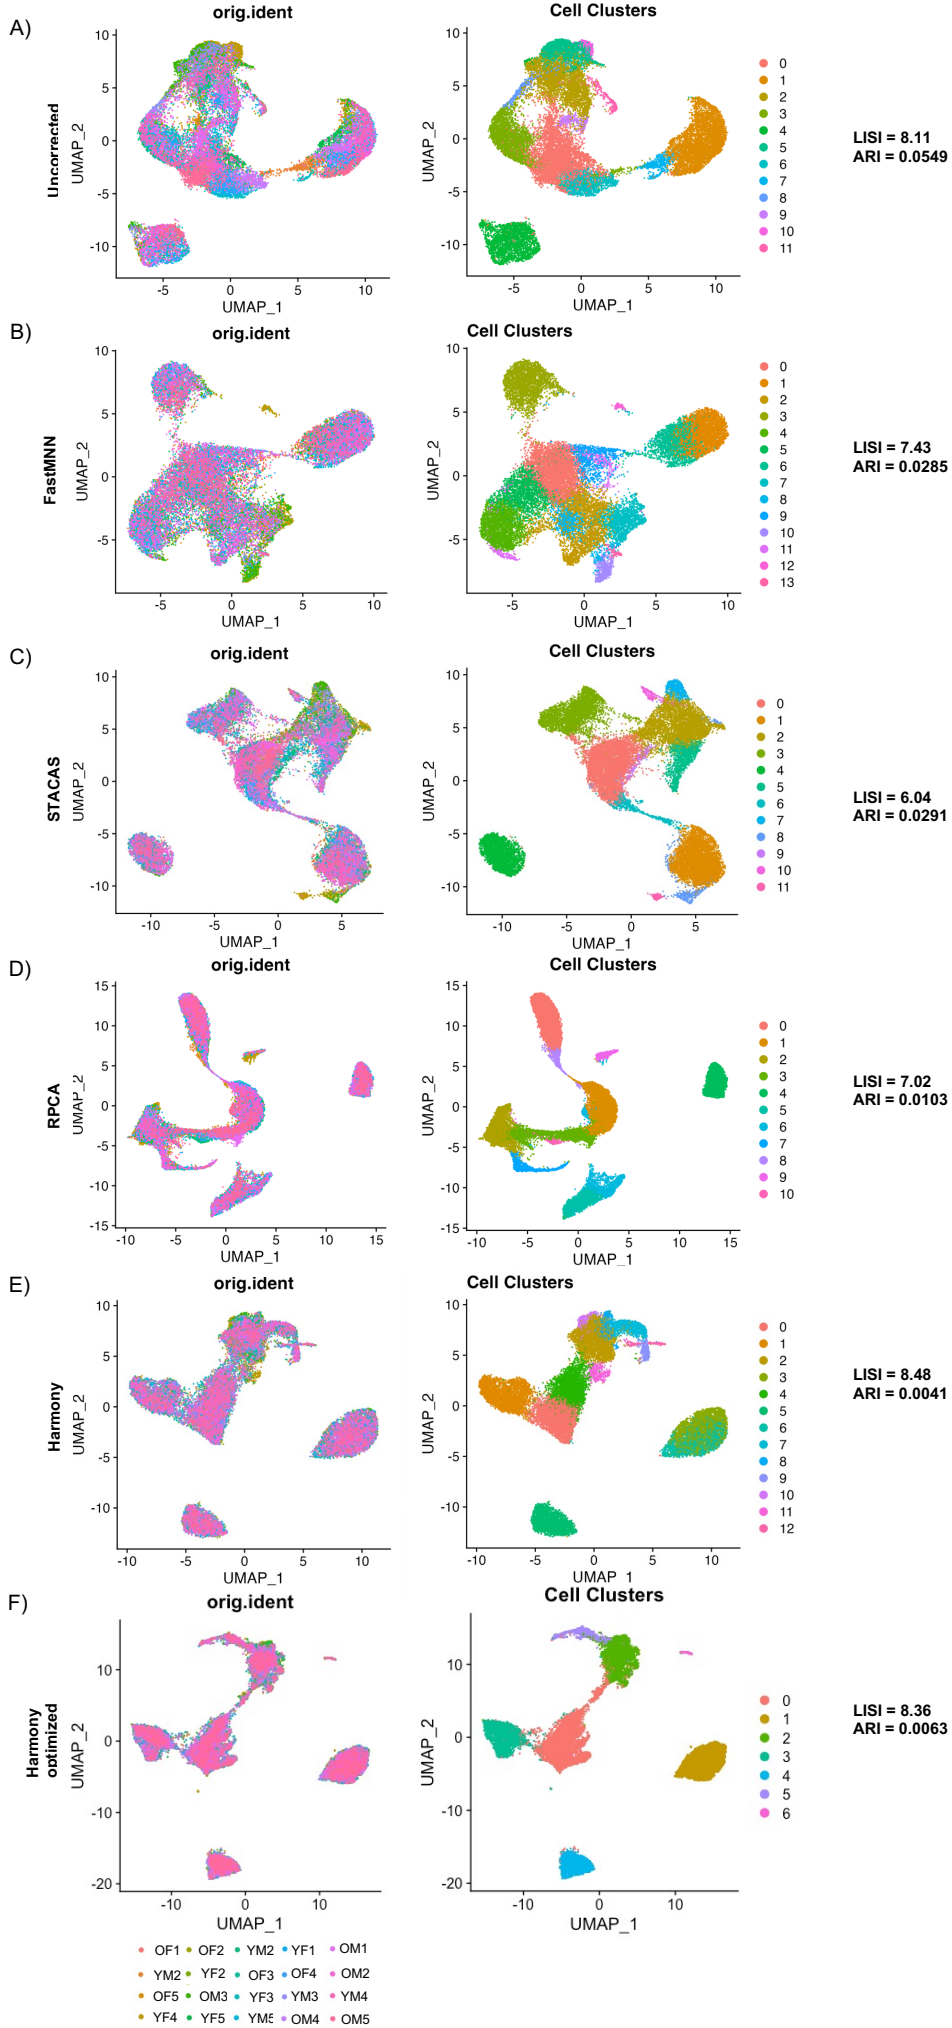

Supplementary Figure 1

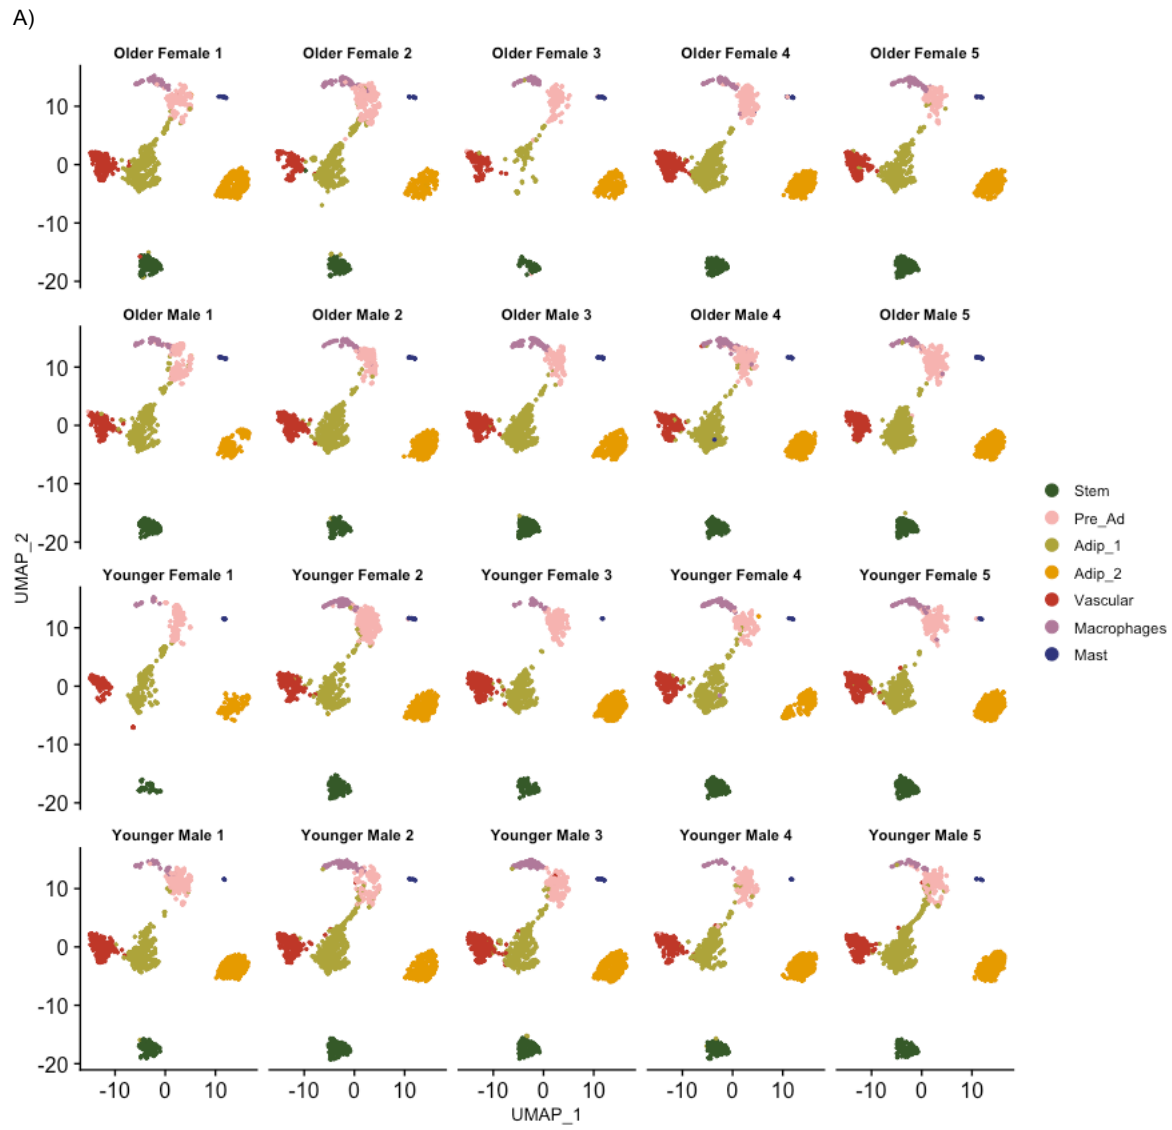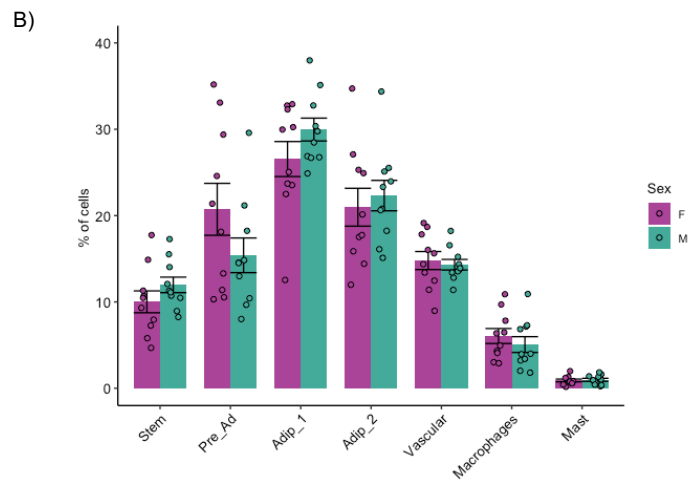

Supplementary Figure 2

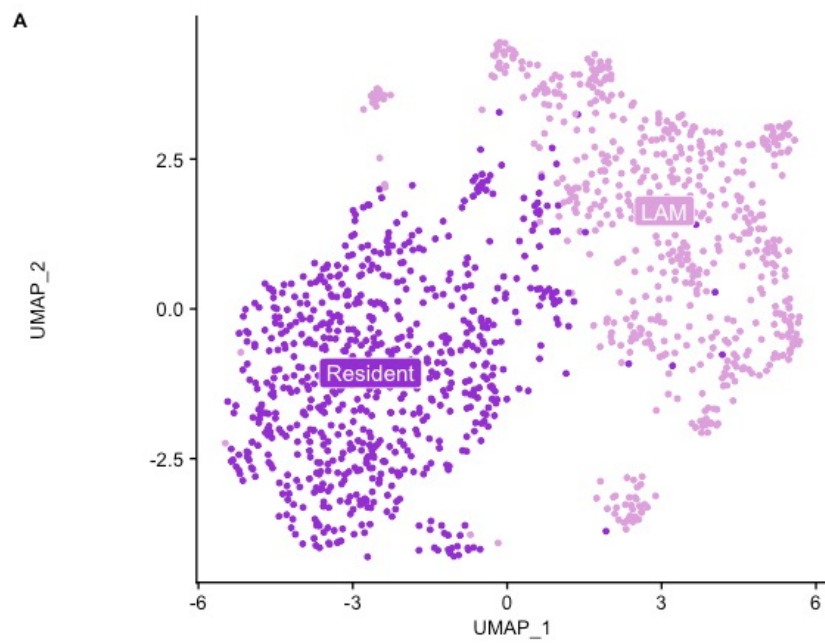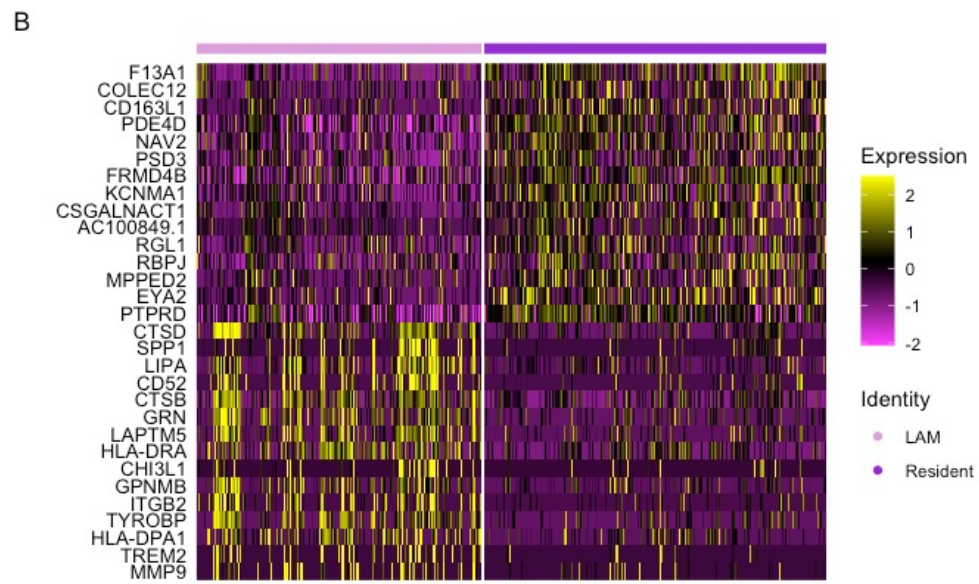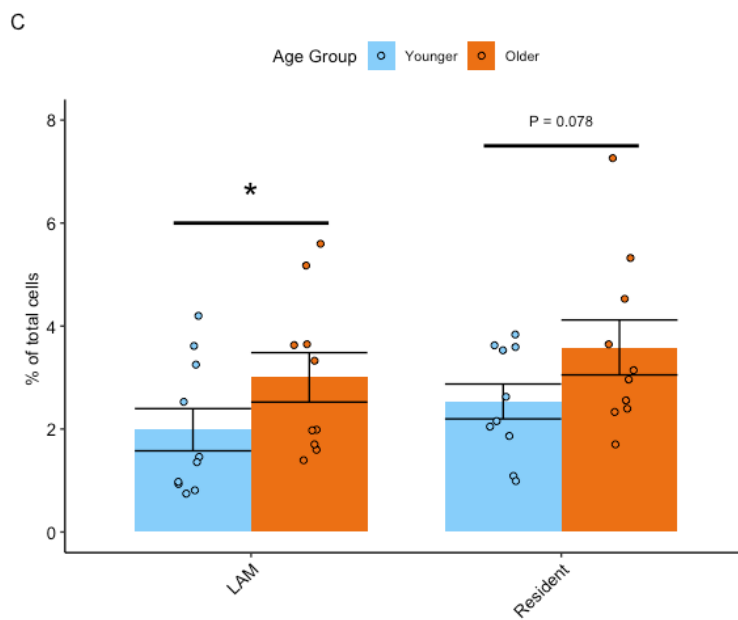

Supplementary Figure 3



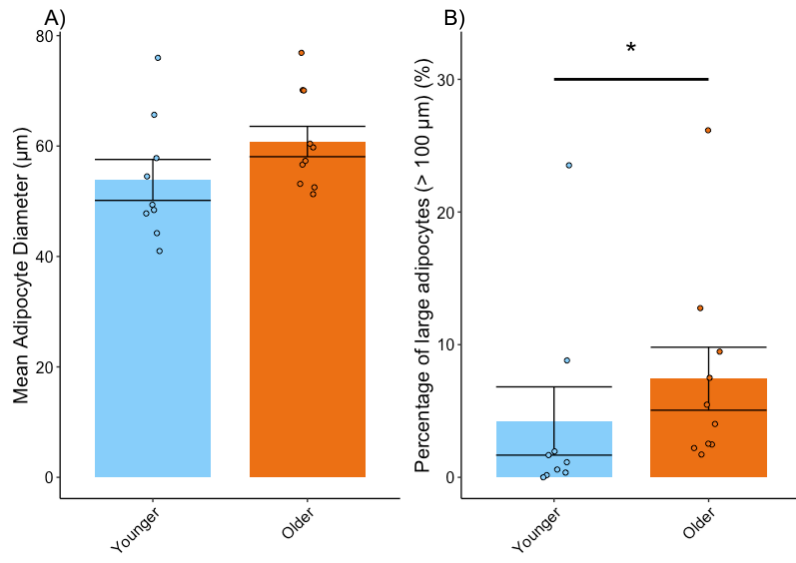

Supplementary Figure 4

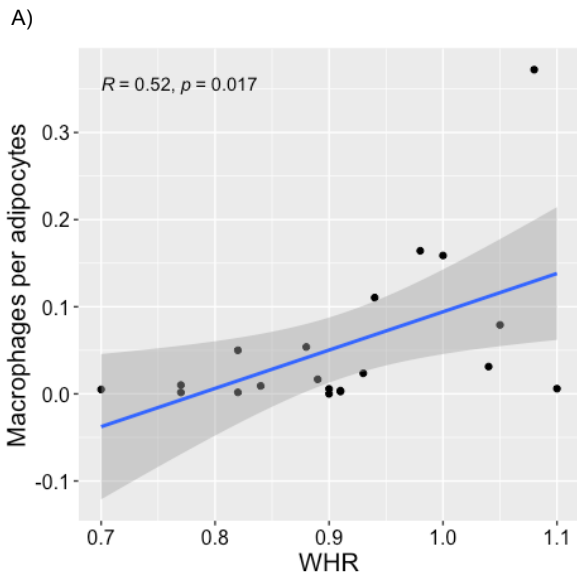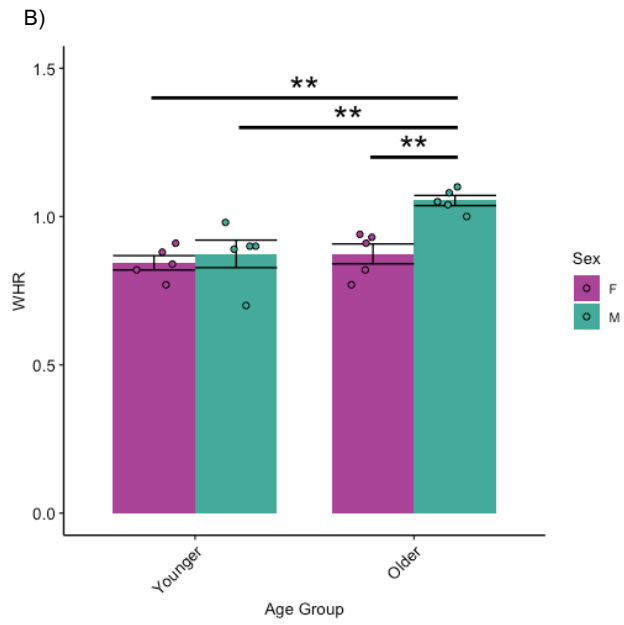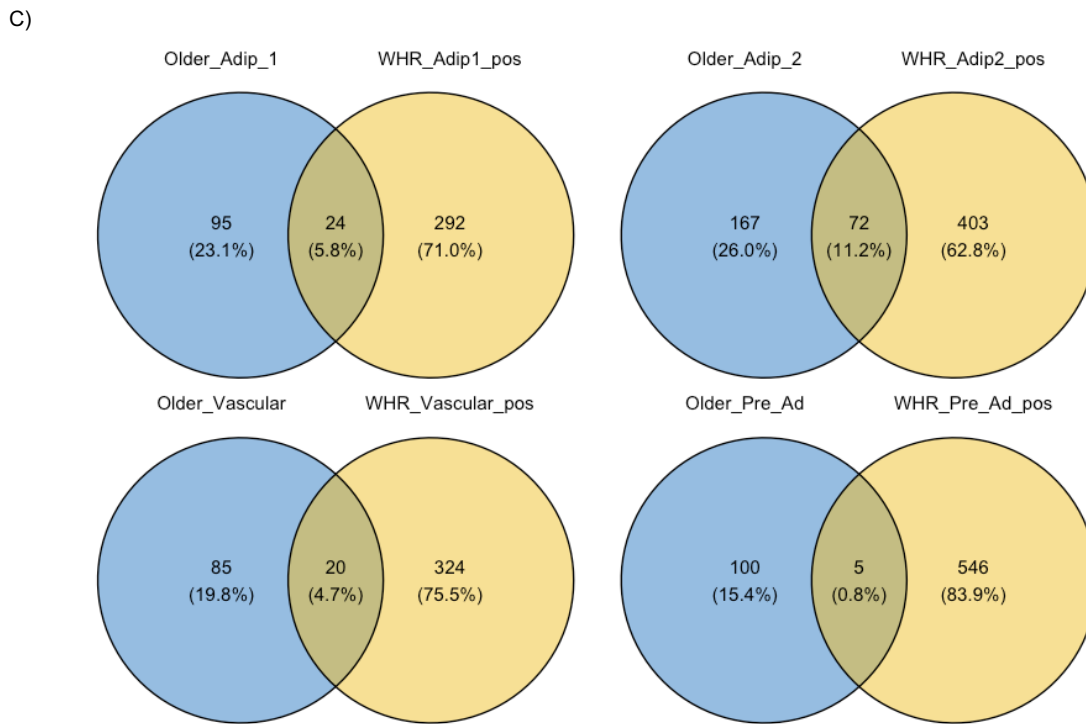

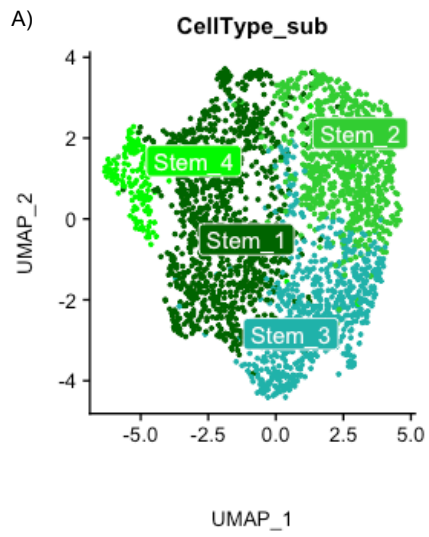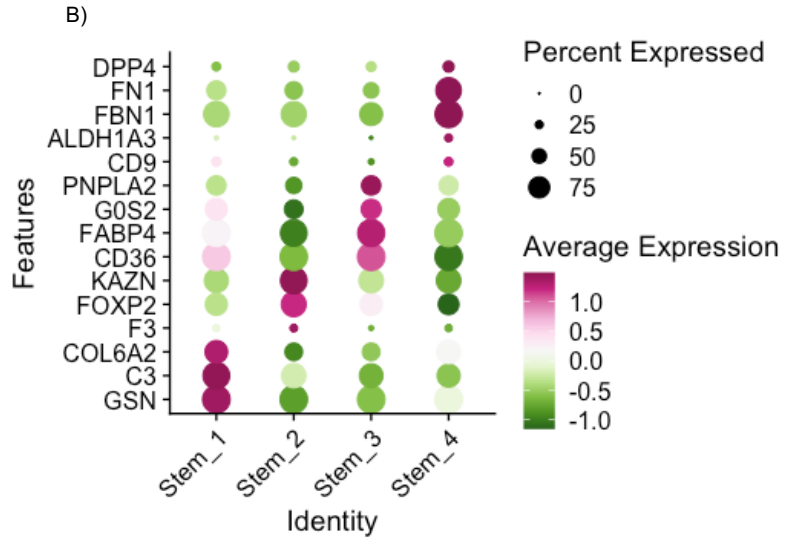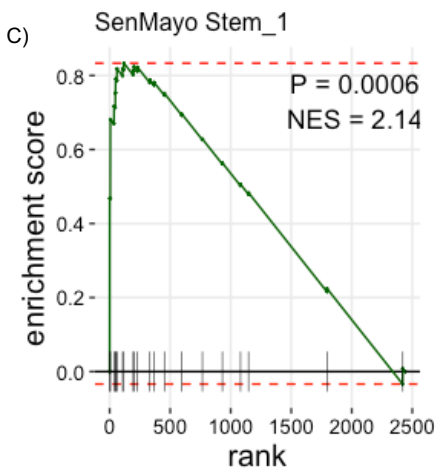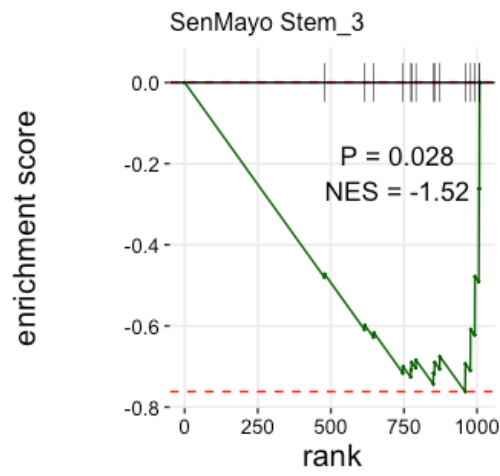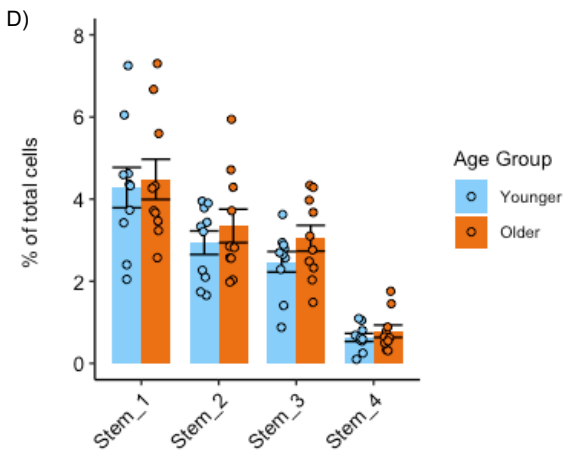

Supplement: ACEL-23-e14287-s002.pdf [file ACEL-23-e14287-s002.pdf]
